# Supplementary material for: Synthesis, crystal structure, and magnetic properties of layered SmCrS2−xSexO solid solutions
Source: Royal Society of Chemistry journal article supplement (doi:10.1039/d0qi00815j), 2020-01-01
Supplement: d0qi00815j1.pdf [file d0qi00815j1.pdf]

## Electronic Supplementary Information

# Synthesis, Crystal Structure and Magnetic Properties of Layered $\text{SmCrS}_{2-x}\text{Se}_x\text{O}$ Solid Solutions

*Yi Xiao,<sup>a,b</sup> Xian Zhang,<sup>\*b</sup> Ruiqi Wang,<sup>a</sup> Chong Zheng,<sup>c</sup> Fuqiang Huang<sup>\*a,d</sup>*

<sup>a</sup> State Key Laboratory of Rare Earth Materials Chemistry and Applications, College of Chemistry and Molecular Engineering, Peking University, Beijing 100871, P. R. China.

<sup>b</sup> Qian Xuesen Laboratory of Space Technology, China Academy of Space Technology, Beijing 100094, P. R. China.

<sup>c</sup> Department of Chemistry and Biochemistry, Northern Illinois University, DeKalb, Illinois 60115, USA.

<sup>d</sup> CAS Key Laboratory of Materials for Energy Conversion and State Key Laboratory of High Performance Ceramics and Superfine Microstructure, Shanghai Institute of Ceramics, Chinese Academy of Sciences, Shanghai 200050, P. R. China.

1. Figure S1: Magnetic structure of NdCrS<sub>2</sub>O at 4 K.

Page S2

2. Figure S2: The honeycomb Cr layers with different spin orderings.

Page S3

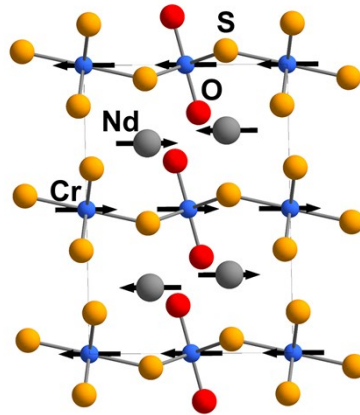

**Figure S1.** Magnetic structure of NdCrS<sub>2</sub>O at 4 K.

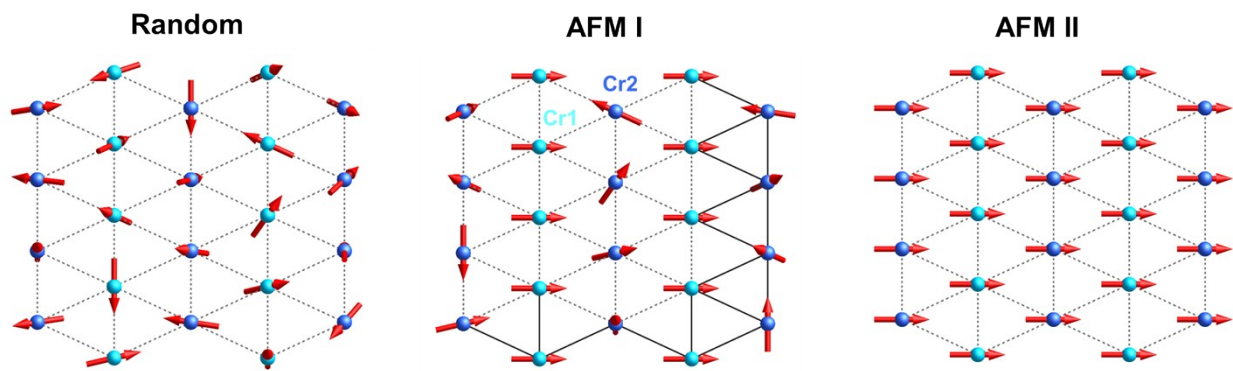

**Figure S2.** The honeycomb Cr layers with different spin orderings: (a) random, (b) Cr1 spins ordering and Cr2 spins random, (c) ordering.
